# Supplementary material for: Depolymerization of alkaline lignin over mesoporous KF/γ-Al2O3
Source: Royal Society of Chemistry journal article supplement (doi:10.1039/d0nj03063e), 2020-01-01
Supplement: d0nj03063e1.pdf [file d0nj03063e1.pdf]

## Supporting information

### Depolymerization of alkaline lignin over mesopores

#### KF/ $\gamma$ -Al<sub>2</sub>O<sub>3</sub>

Yinshuang Guan, Wei Zhao\*, Kaishuai Liu, Tiantian Guo, Dingkai Wang, Mingyu Cui, Shuiyuan Fu, Xing Fan, Xianyong Wei

Key Laboratory of Coal Processing and Efficient Utilization, China University of Mining & Technology, Xuzhou 221116, Jiangsu, People's Republic of China

Corresponding author: Wei Zhao

E- mail address: [zhaow1965@163.com](mailto:zhaow1965@163.com)

---

\* Corresponding author

E- mail address: [zhaow1965@163.com](mailto:zhaow1965@163.com).

# 1. GC/MS analysis of liquid products from lignin depolymerization with no catalyst

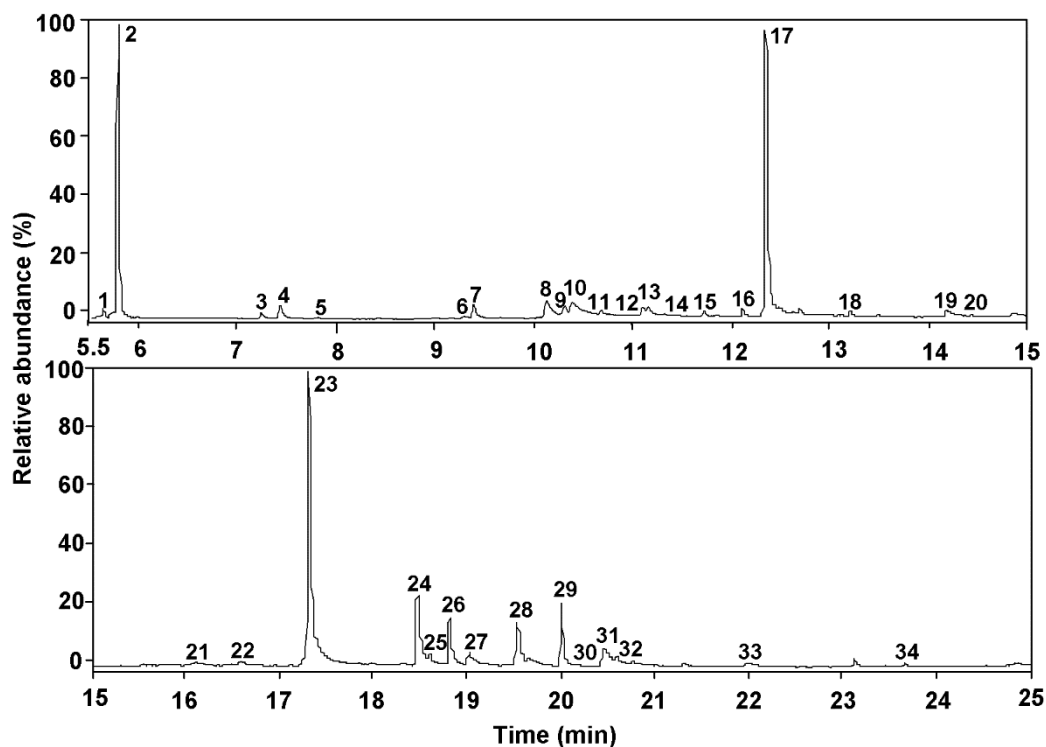

Fig. S1. TIC of liquid product from lignin depolymerization with no catalyst at 190 °C.

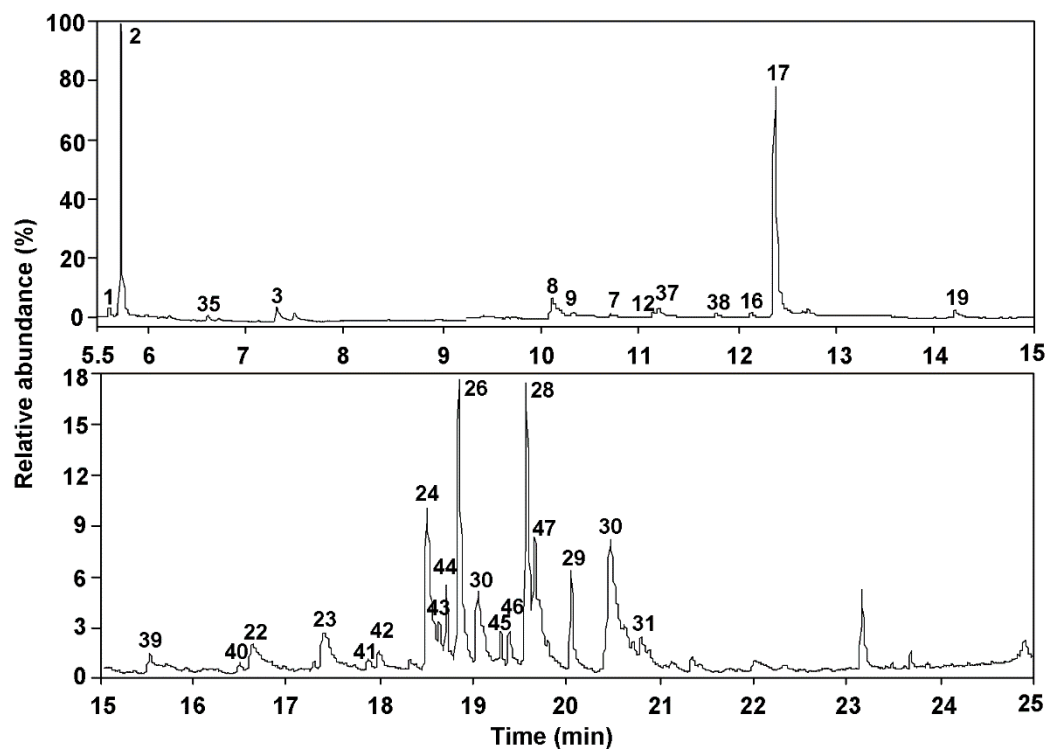

Fig. S2. TIC of liquid product from lignin depolymerization with no catalyst at 210 °C.

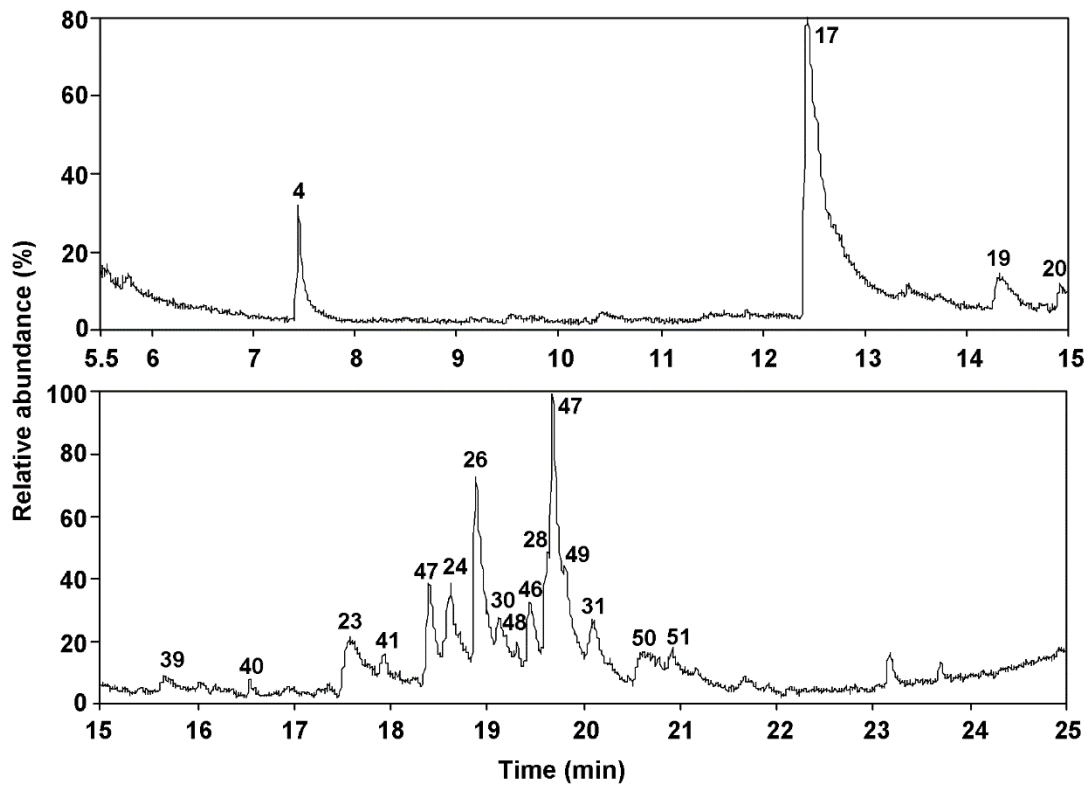

Fig. S3. TIC of liquid product from lignin depolymerization with no catalyst at 230 °C.

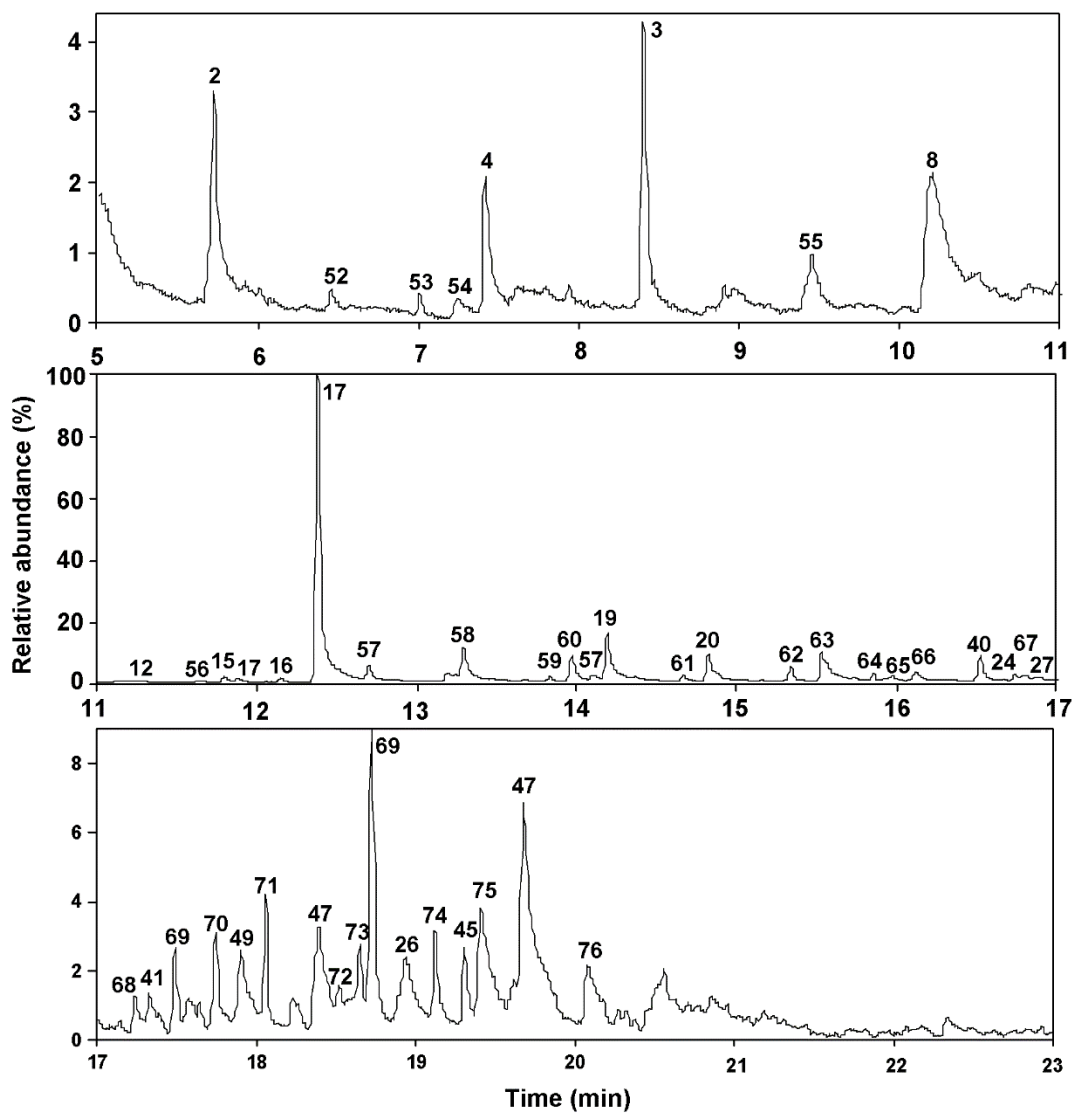

**Fig. S4.** TIC of liquid product from lignin depolymerization with no catalyst at 250 °C.

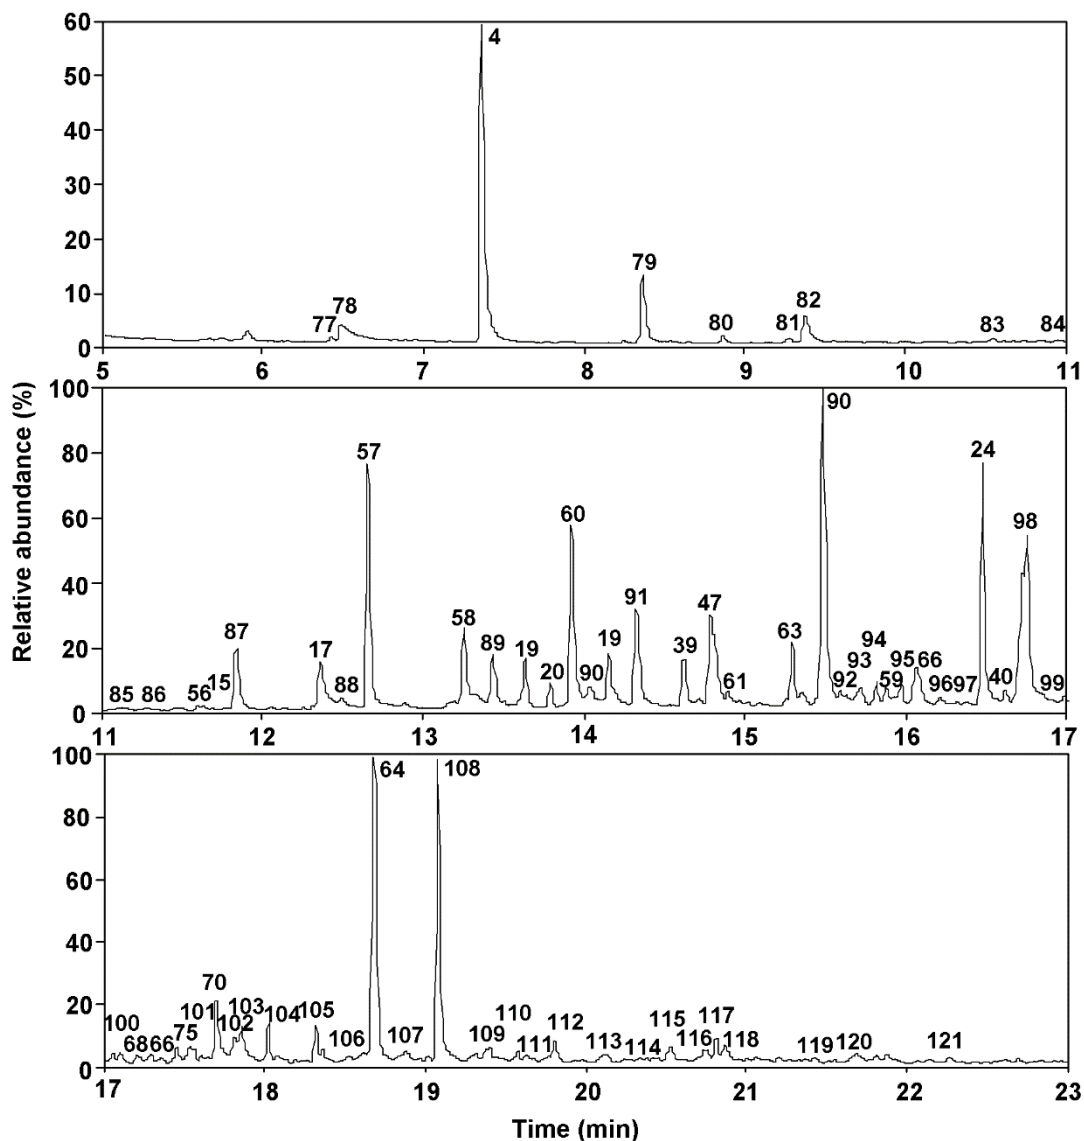

Fig. S5. TIC of liquid product from lignin depolymerization with no catalyst at 270 °C.

**Table S1**

Aliphatic compounds in liquid products from lignin depolymerization at different temperatures with no catalyst.

| Peak | Compound                                 | Relative content (%) |        |        |        |        |
|------|------------------------------------------|----------------------|--------|--------|--------|--------|
|      |                                          | 190 °C               | 210 °C | 230 °C | 250 °C | 270 °C |
| 1    | methyl 2-oxopropanoate                   | 0.36                 | 0.63   | -      | -      | -      |
| 2    | methyl 2-hydroxypropanoate               | 16.14                | 19.94  | 3.80   | 1.31   | -      |
| 3    | methyl 2-hydroxybutanoate                | 0.27                 | 0.69   | -      | 1.18   | -      |
| 4    | 4-hydroxy-4-methylpentan-2-one           | 0.68                 | -      | 10.80  | 0.81   | 5.79   |
| 5    | 4-oxopentyl formate                      | 0.20                 | -      | -      | -      | -      |
| 7    | 1,4-dihydroxybut-2-yl acetate            | 0.54                 | -      | -      | -      | -      |
| 9    | Methyl 4-oxovalerate                     | 0.24                 | 0.44   | -      | -      | -      |
| 11   | 2,2-dimethylbut-1-ol                     | 0.41                 | -      | -      | -      | -      |
| 12   | Dimethyl succinate                       | 0.54                 | 0.28   | -      | 0.11   | -      |
| 13   | 1,1'-oxobis (propan-2-ol)                | 0.30                 | -      | -      | -      | -      |
| 15   | Dimethyl succinate                       | 0.56                 | -      | -      | 0.58   | 0.04   |
| 16   | 1,1-dimethoxyoctane                      | 1.85                 | 0.63   | -      | 0.39   | -      |
| 18   | 1,1-dimethoxyhexane                      | 0.99                 | -      | -      | -      | -      |
| 35   | 3-methoxybut-2-ol                        | -                    | 0.16   | -      | -      | -      |
| 36   | 1-hydroxypentan-2-one                    | -                    | 0.47   | -      | -      | -      |
| 37   | 2-(2-(2-methoxyethoxy) ethoxy) eth-1-ol  | -                    | 0.44   | -      | -      | -      |
| 38   | Dimethyl 2-methylsuccinate               | -                    | 0.58   | -      | -      | -      |
| 52   | 1-(2-methoxyethoxy) -2-methylpropan-2-ol | -                    | -      | -      | 0.11   | -      |
| 53   | 3,4,5-trihydroxyvaleraldehyde            | -                    | -      | -      | 0.07   | -      |
| 54   | 2-methylpent-3-ol                        | -                    | -      | -      | 0.10   | -      |
| 77   | Hex-3-ol                                 | -                    | -      | -      | -      | 0.07   |
| 78   | 4-hydroxybutan-2-one                     | -                    | -      | -      | -      | 0.55   |
| 79   | Methyl                                   | -                    | -      | -      | -      | 1.40   |
| 80   | Methyl                                   | -                    | -      | -      | -      | 0.15   |
| 82   | (E)-3-methylpent-1,3-diene               | -                    | -      | -      | -      | 0.77   |
| 106  | Pentadecane                              | -                    | -      | -      | -      | 0.10   |
| 110  | Cetane                                   | -                    | -      | -      | -      | 0.24   |

**Table S2**

Phenols in liquid products from lignin depolymerization at different temperatures with no catalyst.

| Peak | Compound                                           | Relative content (%) |        |        |        |        |
|------|----------------------------------------------------|----------------------|--------|--------|--------|--------|
|      |                                                    | 190 °                | 210 °C | 230 °C | 250 °C | 270 °C |
| 17   | 2-methoxyphenol                                    | 15.95                | 25.56  | 30.08  | 35.16  | 1.94   |
| 19   | 2-methoxy-4-methylphenol                           | 0.73                 | 1.20   | 4.01   | 0.18   | 3.29   |
| 21   | 2-methoxy-4-vinylphenol                            | 0.61                 | -      | -      | -      | -      |
| 22   | 2,6-dimethoxyphenol                                | 0.47                 | 1.04   | -      | -      | -      |
| 23   | 3-hydroxy-4-methoxybenzaldehyde                    | 30.44                | 1.49   | 6.09   | -      | -      |
| 24   | 1-(4-hydroxy-3-methoxyphenyl) ethan-1-one          | 5.74                 | 4.25   | 3.80   | 0.28   | 6.60   |
| 26   | 4-hydroxy-3-methoxybenzoic acid methyl ester       | 4.01                 | 6.84   | 12.93  | 1.27   | -      |
| 27   | 4-(2-hydroxyethyl) -2-methoxyphenol                | 1.65                 | -      | -      | 0.40   | -      |
| 28   | Methyl 2- (4-hydroxy-3-methoxyphenyl) acetate      | 3.49                 | 4.23   | 2.29   | -      | -      |
| 30   | 2-(4-hydroxy-3-methoxyphenyl) acetic acid          | 2.53                 | 7.38   | 1.88   | -      | -      |
| 31   | 3-(4-hydroxy-3-methoxyphenyl) propionic acid       | 0.22                 | 0.35   | 2.54   | -      | -      |
| 32   | 3-(4-hydroxy-3-methoxyphenyl) -2-oxopropionic acid | 0.30                 | -      | -      | -      | -      |
| 33   | 1-(2,4-dihydroxyphenyl) hexan-1-one                | 0.82                 | -      | -      | -      | -      |
| 39   | 4-ethyl-2-methoxyphenol                            | -                    | 0.40   | 1.21   | -      | 1.28   |
| 40   | 3-methoxy-2,4,6-trimethylphenol                    | -                    | 0.09   | 0.66   | 3.14   | 2.36   |
| 42   | (Z)-2-methoxy-4-(prop-1-en-1-yl) phenol            | -                    | 0.42   | -      | -      | -      |
| 56   | p-cresol                                           | -                    | -      | -      | 0.31   | 0.22   |
| 57   | 2-methoxy-5-methylphenol                           | -                    | -      | -      | 1.50   | 6.85   |
| 60   | 2-methoxy-3-methylphenol                           | -                    | -      | -      | 3.15   | 5.51   |
| 61   | 2,3,5-trimethylbenzene-1,4-diol                    | -                    | -      | -      | 0.77   | 0.19   |
| 64   | 2-(tert-butyl) -4-methoxyphenol                    | -                    | -      | -      | 0.53   | 7.73   |
| 67   | 2,5-diethylphenol                                  | -                    | -      | -      | 0.18   | -      |
| 69   | 3-(tert-butyl) -4-methoxyphenol                    | -                    | -      | -      | 2.34   | -      |
| 70   | 2,3,5,6-tetramethylbenzene-1,4-diol                | -                    | -      | -      | 0.70   | -      |
| 73   | 2,5-di-tert-butylphenol                            | -                    | -      | -      | 0.25   | -      |
| 88   | 4-methoxyphenol                                    | -                    | -      | -      | -      | 0.23   |
| 90   | 1-(2,5-dihydroxyphenyl) ethan-1-one                | -                    | -      | -      | -      | 9.87   |
| 91   | 2,4,6-trimethylphenol                              | -                    | -      | -      | -      | 2.98   |
| 93   | 2-isopropyl-5-methylphenol                         | -                    | -      | -      | -      | 0.56   |
| 98   | 2,3,4,6-tetramethylphenol                          | -                    | -      | -      | -      | 8.77   |
| 102  | 1-(2-hydroxy-4,5-dimethylphenyl) ethan-1-one       | -                    | -      | -      | -      | 0.20   |
| 111  | 2,6-diisopropylphenol                              | -                    | -      | -      | -      | 0.10   |
| 112  | 2- (tert-butyl) -4,6-dimethylphenol                | -                    | -      | -      | -      | 0.60   |
| 118  | 3,6-dimethyl-2- (2-methylbut-3-en-2-yl) phenol     | -                    | -      | -      | -      | 0.39   |

**Table S3**

Non-phenolic aromatic compounds in liquid products from lignin depolymerization at different temperatures with no catalyst.

| Peak | Compound                                               | Relative content (%) |        |        |        |        |
|------|--------------------------------------------------------|----------------------|--------|--------|--------|--------|
|      |                                                        | 190 °C               | 210 °C | 230 °C | 250 °C | 270 °C |
| 20   | 1,2-dimethoxy-3-methylbenzene                          | 0.76                 | -      | 2.38   | 4.22   | 0.57   |
| 25   | Dimethyl isophthalate                                  | 0.36                 | -      | -      | -      | -      |
| 29   | (1,1-dimethoxypropane-2-yl) benzene                    | 4.59                 | 1.99   | -      | -      | -      |
| 34   | Butyl isophthalate                                     | 0.28                 | -      | -      | -      | -      |
| 41   | 3-ethoxy-4-methoxybenzaldehyde                         | -                    | 0.20   | 0.96   | 0.23   | -      |
| 43   | Dimethyl terephthalate                                 | -                    | 0.55   | -      | -      | -      |
| 44   | (3,4-dimethoxyphenyl) (methoxy)<br>methanol            | -                    | 0.80   | -      | -      | -      |
| 45   | 4-(dimethoxymethyl)<br>-1,2-dimethoxybenzene           | -                    | 0.52   | -      | 0.54   | -      |
| 46   | 1-(3,4-dimethoxyphenyl) ethan-1-one                    | -                    | 0.65   | 3.67   | -      | -      |
| 47   | 3,4-dimethoxybenzaldehyde                              | -                    | 1.60   | 9.98   | 1.31   | 4.09   |
| 49   | 1-ethoxy-2-methoxy-4-propylbenzene                     | -                    | -      | 5.45   | 0.87   | -      |
| 50   | 2-(3,4-dimethoxyphenyl)<br>-2-oxoacetaldehyde          | -                    | -      | 1.77   | -      | -      |
| 58   | 1,2-dimethoxybenzene                                   | -                    | -      | -      | 3.33   | 0.28   |
| 59   | 1,2-dimethoxy-4-methylbenzene                          | -                    | -      | -      | 0.43   | 0.27   |
| 62   | 1,5-dimethoxy-2,3-dimethylbenzene                      | -                    | -      | -      | 1.26   | -      |
| 63   | 1,4-dimethoxy-2-methylbenzene                          | -                    | -      | -      | 5.12   | 1.27   |
| 114  | 2-(5-isopropyl-2-methylphenyl)<br>ethan-1-ol           | -                    | -      | -      | -      | 0.04   |
| 115  | 1-(2,3,5,6-tetramethylphenyl) ethan-1-one              | -                    | -      | -      | -      | 0.47   |
| 116  | 2-(4-ethoxyphenyl) -2-methylpropanal                   | -                    | -      | -      | -      | 0.06   |
| 120  | 1-(4- (tert-butyl) -2,6-dimethylphenyl)<br>ethan-1-one | -                    | -      | -      | -      | 0.49   |



**Table S4**

Other compounds in liquid products from lignin depolymerization at different temperatures with no catalyst.

| Peak | Compound                                                           | Relative content (%) |        |        |        |        |
|------|--------------------------------------------------------------------|----------------------|--------|--------|--------|--------|
|      |                                                                    | 190 °C               | 210 °C | 230 °C | 250 °C | 270 °C |
| 6    | Dihydrofuran-2 (3H) -one                                           | 0.09                 | -      | -      | -      | -      |
| 8    | Methyl furan-2-carboxylate                                         | 0.96                 | 4.5    | -      | 1.96   | -      |
| 10   | 3-hydroxydihydrofuran-2 (3H) -one                                  | 0.87                 | -      | -      | -      | -      |
| 14   | 2,2,4,5-tetramethyl-1,3-dioxolane                                  | 0.04                 | -      | -      | -      | -      |
| 48   | (E) methyl 2- (3,4-dimethyl-5-methylfuran-2 (5H) -subunit) acetate | -                    | -      | 0.46   | -      | -      |
| 51   | 3-isopentyl-2,4,4-trimethylcyclohex-2-en-1-one                     | -                    | -      | 1.39   | -      | -      |
| 55   | 2-hydroxypropionamide                                              | -                    | -      | -      | 0.52   | -      |
| 81   | 2,3,4,5-tetramethylfuran                                           | -                    | -      | -      | -      | 0.107  |
| 83   | 5,5-dimethylcyclohexane-1,3-dione                                  | -                    | -      | -      | -      | 0.09   |
| 86   | 1-ethoxy-3-methoxy-5-methylcyclohexane                             | -                    | -      | -      | -      | 0.09   |
| 87   | 3,4,4-trimethylcyclopent-2-en-1-one                                | -                    | -      | -      | -      | 1.97   |
| 89   | 2,3,4,5-tetramethylcyclopent-2-en-1-one                            | -                    | -      | -      | -      | 1.34   |
| 96   | 1-methylnaphthalene                                                | -                    | -      | -      | -      | 0.24   |
| 101  | 4-methoxy-6-propylbenzo [d] [1,3] dioxolene                        | -                    | -      | -      | -      | 0.07   |
| 103  | 1- (benzo [d] [1,3] dioxol-5-yl) propan-1-ol                       | -                    | -      | -      | -      | 0.44   |
| 107  | 5,5-dimethyl-1,2-dipropylcyclopentane-1,3-diene                    | -                    | -      | -      | -      | 0.20   |
| 113  | 5,6,7,8-tetramethyl-1,2,3,4-tetrahydronaphthalene                  | -                    | -      | -      | -      | 0.53   |
| 117  | 4,7-dimethoxy-2-methyl-1H-indene                                   | -                    | -      | -      | -      | 0.40   |
| 121  | 1-(5,5-dimethylcyclopent-1-en-1-yl)-2-methoxybenzene               | -                    | -      | -      | -      | 0.16   |

## 2. GC/MS analysis of liquid products from lignin depolymerization over $\text{KF}/\gamma\text{-Al}_2\text{O}_3$

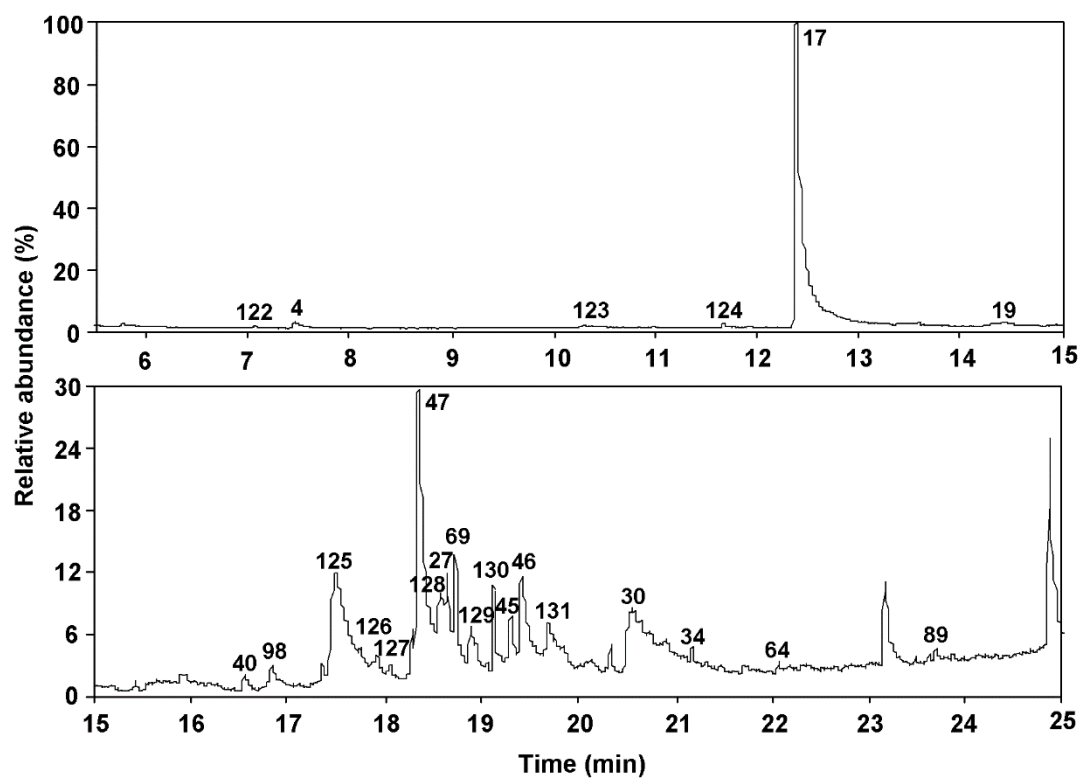

Fig. S6. TIC of liquid products from lignin depolymerization over  $\text{KF}/\gamma\text{-Al}_2\text{O}_3$  at 190 °C.

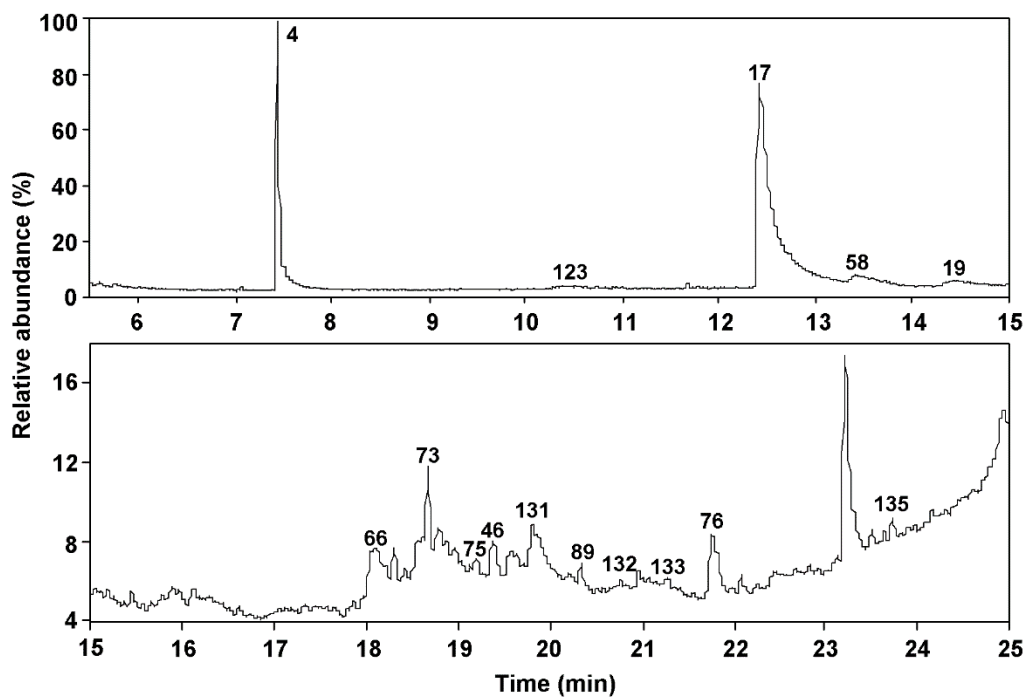

Fig. S7. TIC of liquid products from lignin depolymerization over  $\text{KF}/\gamma\text{-Al}_2\text{O}_3$  at 210 °C.

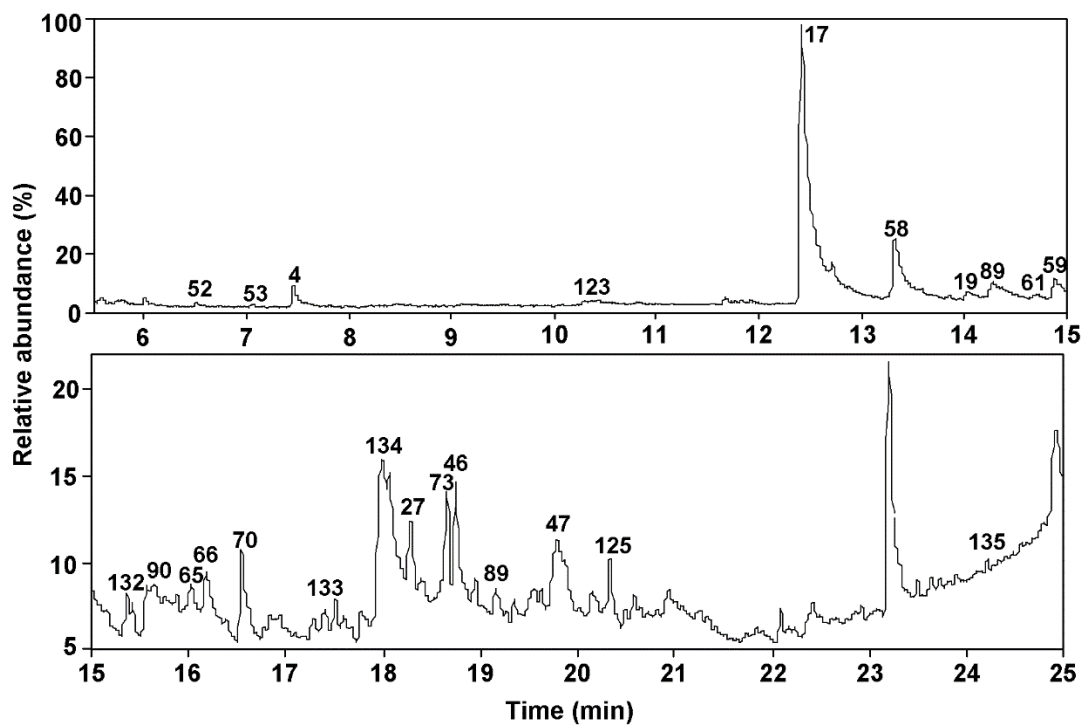

Fig. S8. TIC of liquid product from lignin depolymerization over  $\text{KF}/\gamma\text{-Al}_2\text{O}_3$  at 230 °C.

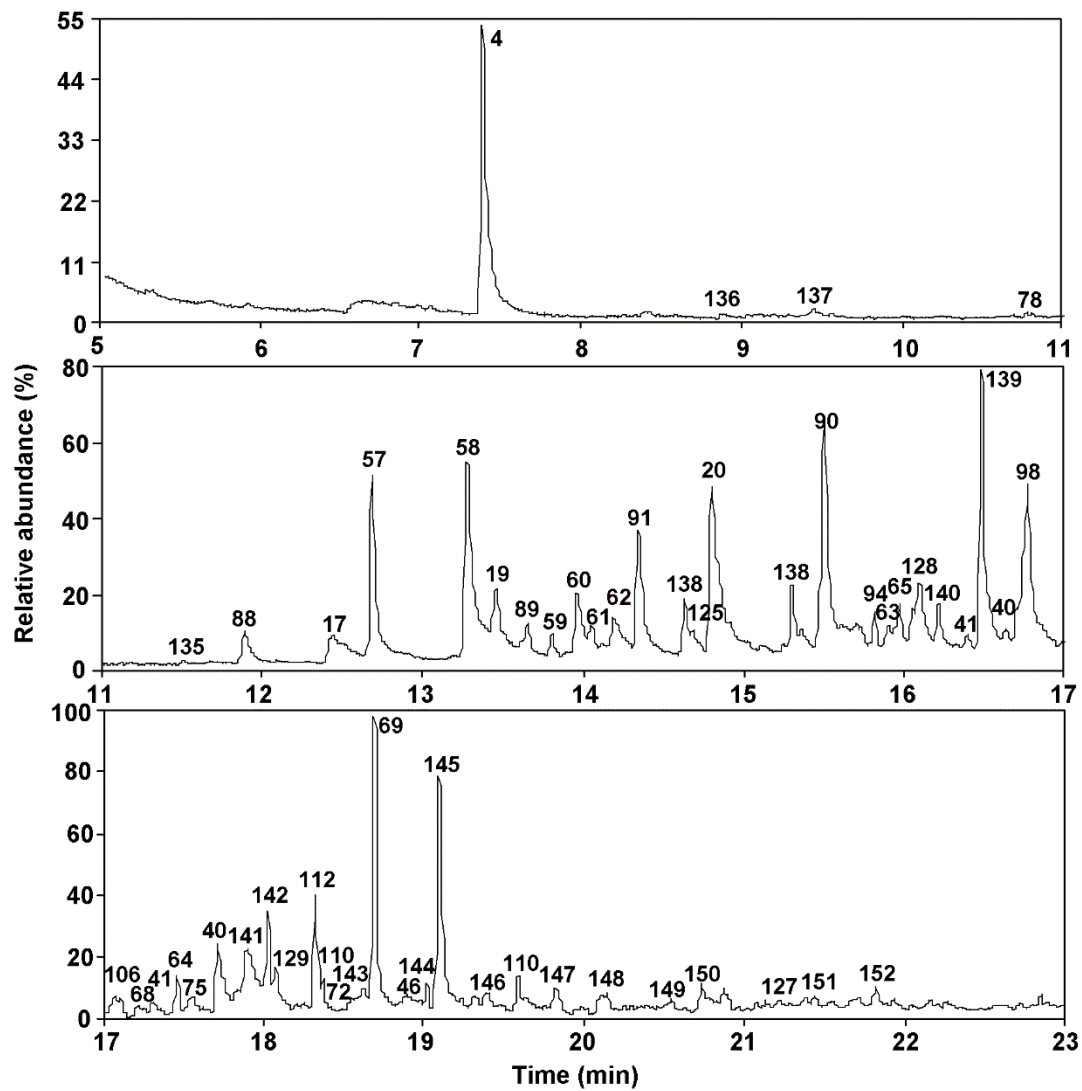

Fig. S9. TIC of liquid product from lignin depolymerization over  $\text{KF}/\gamma\text{-Al}_2\text{O}_3$  at 250 °C.

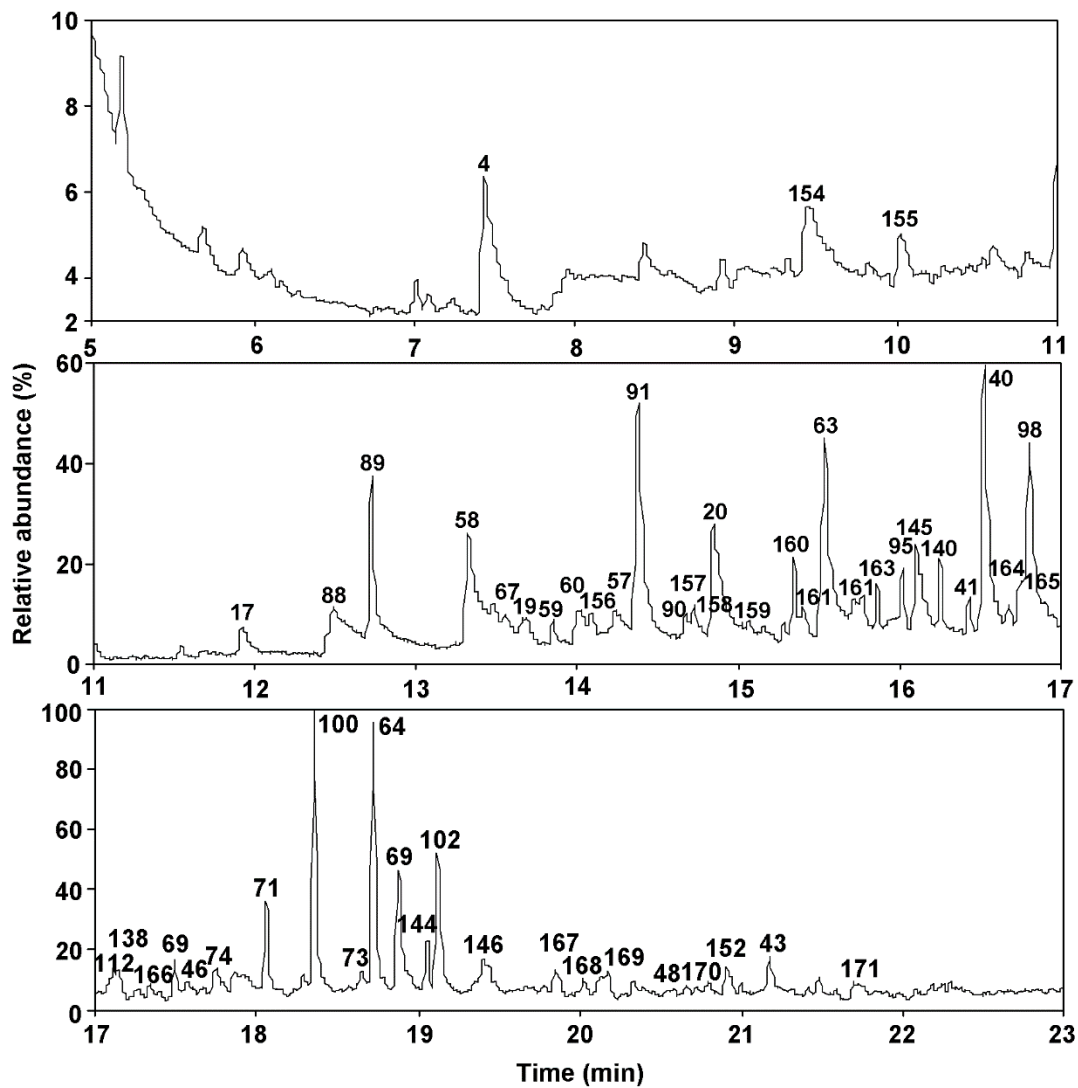

Fig. S10. TIC of liquid product from lignin depolymerization over  $\text{KF}/\gamma\text{-Al}_2\text{O}_3$  at 270 °C.

**Table S5**

Aliphatic compounds in liquid products from lignin depolymerization at different temperatures over KF/ $\gamma$ -Al<sub>2</sub>O<sub>3</sub>.

| Peak | Compound                                | Relative content (%) |        |        |        |        |
|------|-----------------------------------------|----------------------|--------|--------|--------|--------|
|      |                                         | 190 °C               | 210 °C | 230 °C | 250 °C | 270 °C |
| 1    | Methyl 2-oxopropionate                  | 0.28                 | -      | -      | -      | -      |
| 2    | Methyl 2-hydroxypropionate              | 0.95                 | -      | -      | 0.13   | 0.76   |
| 4    | 4-hydroxy-4-methylpentan-2-one          | 9.32                 | 13.58  | 9.46   | 2.58   | 0.92   |
| 52   | 1-(2-methoxyethoxy)-2-methylpropan-2-ol | -                    | -      | 0.16   | -      | -      |
| 53   | 3,4,5-trihydroxyvaleraldehyde           | -                    | -      | 0.19   | 0.23   | -      |
| 78   | 4-hydroxybutan-2-one                    | -                    | -      | -      | 0.24   | -      |
| 79   | Methyl 2-hydroxy-3-methylbutanoate      | -                    | -      | -      | -      | 2.18   |
| 106  | Pentadecane                             | -                    | -      | -      | 1.03   | -      |
| 110  | Cetane                                  | -                    | -      | -      | 0.85   | -      |
| 154  | 2,2'-oxybis (ethyl-1-ol)                | -                    | -      | -      | 0.49   | 0.48   |

**Table S6**Phenols in liquid products from lignin depolymerization at different temperatures over KF/ $\gamma$ -Al<sub>2</sub>O<sub>3</sub>

| Peak | Compound                                     | Relative content (%) |        |        |        |        |
|------|----------------------------------------------|----------------------|--------|--------|--------|--------|
|      |                                              | 190 °C               | 210 °C | 230 °C | 250 °C | 270 °C |
| 17   | 2-methoxyphenol                              | 51.74                | 59.29  | 53.28  | 1.82   | 1.02   |
| 19   | 2-methoxy-4-methylphenol                     | 1.09                 | 4.77   | 1.36   | 1.56   | 0.11   |
| 27   | 4-(2-hydroxyethyl) -2-methoxyphenol          | 0.54                 | -      | 0.90   | -      | -      |
| 30   | 2- (4-hydroxy-3-methoxyphenyl) acetic acid   | 3.40                 | -      | -      | -      | -      |
| 40   | 3-methoxy-2,4,6-trimethylphenol              | 0.41                 | -      | -      | 2.98   | 7.66   |
| 57   | 2-methoxy-5-methylphenol                     | -                    | -      | -      | 4.95   | 0.59   |
| 60   | 2-methoxy-3-methylphenol                     | -                    | -      | -      | 1.72   | 0.75   |
| 61   | 2,3,5-trimethylbenzene-1,4-diol              | -                    | -      | 0.89   | 0.35   | -      |
| 64   | 2-(tert-butyl) -4-methoxyphenol              | 0.14                 | -      | -      | 0.82   | 8.96   |
| 67   | 2,5 diethylphenol                            | -                    | -      | -      | 0.12   | 0.07   |
| 69   | 3-(tert-butyl) -4-methoxyphenol              | 1.34                 | -      | -      | 6.94   | 4.99   |
| 70   | 2,3,5,6-tetramethylbenzene-1,4-diol          | -                    | -      | 1.56   | -      | -      |
| 73   | 2,5-di-tert-butylphenol                      | -                    | 1.01   | 0.78   | -      | 0.43   |
| 88   | 4-methoxyphenol                              | -                    | -      | -      | 1.22   | 2.69   |
| 89   | 2-methoxy-5-methylphenol                     | -                    | 3.22   | -      | 0.64   | 3.71   |
| 90   | 1-(2,5-dihydroxyphenyl) ethan-1-one          | -                    | -      | 0.89   | 6.83   | 0.38   |
| 91   | 2,4,6-trimethylphenol                        | -                    | -      | -      | 3.66   | 6.61   |
| 98   | 2,3,4,6-tetramethylphenol                    | 0.67                 | -      | -      | 5.71   | 3.56   |
| 102  | 1-(2-hydroxy-4,5-dimethylphenyl) ethan-1-one | -                    | -      | -      | -      | 3.92   |
| 112  | 2-(tert-butyl) -4,6-dimethylphenol           | -                    | -      | -      | 1.98   | 0.07   |
| 123  | phenol                                       | 0.36                 | 0.64   | 0.72   | -      | -      |
| 125  | 4-hydroxy-3-methoxybenzaldehyde              | 9.20                 | -      | -      | 0.13   | -      |
| 126  | 2-hydroxy-4-methoxybenzaldehyde              | 0.66                 | -      | -      | -      | -      |
| 127  | 3-hydroxy-4-methoxybenzaldehyde              | 0.25                 | -      | -      | 0.12   | -      |
| 128  | 5-methoxy-2,3,4-trimethylphenol              | 0.60                 | -      | -      | 2.02   | -      |
| 129  | 3-hydroxy-4-methoxybenzoic acid methyl ester | 1.12                 | -      | -      | 0.50   | -      |
| 139  | 1-(4-hydroxy-3-methoxyphenyl) ethan-1-one    | -                    | -      | -      | 7.89   | -      |
| 140  | 4,5-dimethylbenzene-1,3-diol                 | -                    | -      | -      | 0.98   | 1.03   |
| 145  | 2-(tert-butyl) -6-methylphenol               | -                    | -      | -      | 7.12   | 2.79   |
| 149  | (E) -4-methyl-2- (pent-3-en-2-yl) phenol     | -                    | -      | -      | 0.42   | -      |
| 150  | 2-allyl-5-ethoxy-4-methoxyphenol             | -                    | -      | -      | 0.04   | -      |
| 160  | 1-(2,6-dihydroxy-3-methylphenyl) ethan-1-one | -                    | -      | -      | -      | 0.99   |
| 161  | 1-(3,4-dihydroxyphenyl) propan-1-one         | -                    | -      | -      | -      | 0.32   |
| 164  | 4-methoxy-2,3,6-trimethylphenol              | -                    | -      | -      | -      | 0.18   |

**Table S7**

Non-phenolic aromatic compounds in liquid products from lignin depolymerization at different temperatures over KF/ $\gamma$ -Al<sub>2</sub>O<sub>3</sub>.

| Peak | Compound                                     | Relative content (%) |        |        |        |        |
|------|----------------------------------------------|----------------------|--------|--------|--------|--------|
|      |                                              | 190 °C               | 210 °C | 230 °C | 250 °C | 270 °C |
| 20   | 1,2-dimethoxy-3-methylbenzene                | -                    | -      | -      | 5.95   | 4.39   |
| 34   | Butyl isophthalate                           | 0.28                 | -      | -      | -      | -      |
| 41   | 3-ethoxy-4-methoxybenzaldehyde               | -                    | -      | -      | 0.55   | 0.51   |
| 43   | Dimethyl terephthalate                       | -                    | -      | -      | -      | 1.06   |
| 45   | 4-(dimethoxymethyl)-1,2-dimethoxybenzene     | 0.99                 | -      | -      | -      | -      |
| 46   | 1-(3,4-dimethoxyphenyl) ethan-1-one          | 3.24                 | 1.85   | 1.07   | 0.25   | 0.20   |
| 47   | 3,4-dimethoxybenzaldehyde                    | 9.44                 | 0.46   | 1.82   | -      | -      |
| 58   | 1,2-dimethoxybenzene                         | -                    | 3.27   | 8.97   | 7.66   | 6.28   |
| 59   | 1,2-dimethoxy-4-methylbenzene                | -                    | -      | 2.82   | 0.89   | 0.38   |
| 63   | 1,4-dimethoxy-2-methylbenzene                | -                    | -      | -      | 1.43   | 6.01   |
| 65   | 1,2,3-trimethoxybenzene                      | -                    | -      | 0.15   | 0.74   | -      |
| 66   | 4-ethyl-1,2-dimethoxybenzene                 | -                    | 1.74   | 0.98   | -      | -      |
| 68   | Isopropyl 2-methoxybenzoate                  | -                    | -      | -      | 0.26   | -      |
| 71   | 1-(2,4-dimethoxyphenyl) propan-2-one         | -                    | -      | -      | -      | 2.30   |
| 72   | (E)-1,2-dimethoxy-4-(prop-1-en-1-yl) benzene | -                    | -      | -      | 0.44   | -      |
| 74   | (4-(tert-butyl) phenyl) methanol             | -                    | -      | -      | 0.16   | 0.48   |
| 75   | 1-(2,4-dimethoxyphenyl) ethan-1-one          | -                    | 2.90   | -      | 1.50   | -      |
| 94   | 3,5-dimethoxy-4-methylbenzaldehyde           | -                    | -      | -      | 0.54   | -      |
| 95   | 4-isopropylbenzoic acid                      | -                    | -      | -      | -      | 1.27   |
| 100  | 1-(tert-butyl)-2-methoxy-3-methylbenzene     | -                    | -      | -      | -      | 8.50   |
| 130  | 2-isopropyl-1-methoxy-4-methylbenzene        | 1.31                 | -      | -      | -      | -      |
| 131  | 3,4-Dimethoxybenzoic acid methyl ester       | 0.72                 | 2.87   | -      | -      | -      |
| 134  | 1-ethyl-2-methoxy-4-(methoxymethyl) benzene  | -                    | -      | 5.24   | -      | -      |
| 138  | 1-(2-methoxyphenyl) ethan-1-ol               | -                    | -      | -      | 1.07   | 0.16   |
| 141  | 1,2-dimethoxy-4-(methoxymethyl) benzene      | -                    | -      | -      | 2.04   | -      |
| 142  | 1,4-dimethoxy-2-((vinyl)oxy) methyl benzene  | -                    | -      | -      | 1.52   | -      |
| 143  | 1-(3,4-dimethoxyphenyl) butan-1-one          | -                    | -      | -      | 0.22   | -      |
| 144  | 1,3-diisopropyl-2-methoxybenzene             | -                    | -      | -      | 0.52   | 1.45   |
| 146  | 2-(tert-butyl)-1,4-dimethoxybenzene          | -                    | -      | -      | 0.46   | 1.66   |
| 147  | 2,4-diisopropylphenyl acetate                | -                    | -      | -      | 0.81   | -      |
| 148  | 1-(3,4-dimethoxyphenyl) propan-1-one         | -                    | -      | -      | 0.26   | -      |
| 152  | 1,3,5-triisopropylbenzene                    | -                    | -      | -      | 0.10   | 1.25   |
| 153  | (4-(tert-butyl) phenoxy) methyl acetate      | -                    | -      | -      | -      | -      |
| 156  | 1,4-dimethoxybenzene                         | -                    | -      | -      | -      | 0.31   |
| 157  | 2-methoxy-4-(prop-1-en-2-yl) phenyl acetate  | -                    | -      | -      | -      | 0.29   |
| 158  | 2-methoxy-1,3,4-trimethylbenzene             | -                    | -      | -      | -      | 0.07   |



---

|     |                                  |   |   |   |   |      |
|-----|----------------------------------|---|---|---|---|------|
| 162 | 2-(2-methoxyphenyl) acetaldehyde | - | - | - | - | 0.25 |
| 165 | 1,2,3-trimethoxy-5-methylbenzene | - | - | - | - | 0.13 |
| 166 | 3-ethoxy-4-methoxybenzaldehyde   | - | - | - | - | 0.36 |
| 168 | phthalate-4,5-dimethyl           | - | - | - | - | 0.41 |
| 171 | 1,4-bis (pent-3-yl) benzene      | - | - | - | - | 0.02 |

---

**Table S8**

Other compounds in liquid products from lignin depolymerization at different temperatures over KF/ $\gamma$ -Al<sub>2</sub>O<sub>3</sub>.

| Peak | Compound                                                           | Relative content (%) |        |        |        |        |
|------|--------------------------------------------------------------------|----------------------|--------|--------|--------|--------|
|      |                                                                    | 190 °C               | 210 °C | 230 °C | 250 °C | 270 °C |
| 48   | (E) methyl 2- (3,4-dimethyl-5-methylfuran-2 (5H) -subunit) acetate | -                    | -      | -      | -      | 0.05   |
| 89   | 2,3,4,5-tetramethylcyclopent-2-en-1-one                            | 0.46                 | 1.06   | 1.52   | -      | -      |
| 132  | 1-(2-ethyl-5-methoxy-4-methylphenyl) propan-2-amine                | -                    | 0.76   | 0.36   | -      | -      |
| 133  | 2-amino-1-phenylpropan-1-ol                                        | -                    | 0.87   | 0.32   | -      | -      |
| 135  | 4-(4-methylcyclohexyl) benzene-1,2-diol                            | 0.54                 | 1.37   | 4.40   | 0.10   | -      |
| 137  | (Z)-cyclooct-4-ene-1-carbaldehyde                                  | -                    | -      | -      | 0.11   | -      |
| 151  | 1,1'-(6-hydroxybenzofuran-2,5-diyl) bis (ethyl-1-one)              | -                    | -      | -      | 0.14   | -      |
| 155  | 1,2,3,4,5-pentamethylcyclopentane-1,3-diene                        | -                    | -      | -      | -      | 0.32   |
| 159  | 1-(3,4-dihydroxyphenyl)-2- (methylamino) ethan-1-one               | -                    | -      | -      | -      | 0.10   |
| 163  | 2,2-dimethyl-2,3-dihydrobenzofuran-3,7-diol                        | -                    | -      | -      | -      | 0.64   |
| 167  | 1-(2,3-dihydrobenzo [b] [1,4] dioxin-6-yl) ethan-1-one             | -                    | -      | -      | -      | 0.99   |
| 169  | 1,1-dimethyl-2,3-dihydro-1H-indene-4-carboxylic acid ethyl ester   | -                    | -      | -      | -      | 0.87   |
| 170  | 4,4-dimethyl-[1,1'-bis (cyclohexane)]-1', 3'-diene-2,6-dione       | -                    | -      | -      | -      | 0.18   |
| 172  | 8,9-dimethyl-2H-furo [2,3-h] chromen-2-one                         | -                    | -      | -      | -      | 0.13   |
| 174  | 3-(acetoxymethyl) biphenylene-2-carboxylic acid methyl ester       | -                    | -      | -      | -      | 0.41   |

-no detected
